# Supplementary material
Source: publisher figshare collection journal article supplement (https://springernature.figshare.com/ndownloader/files/20018006)
Supplement: Supplementary file [file 20018006]

## Post-Summit Stakeholder Engagement Survey (Day 2)

---

1. The objectives of the **Physical Activity Summit** were clearly explained
  - ☐ Strongly Agree
  - ☐ Agree
  - ☐ Neither agree nor disagree
  - ☐ Disagree
  - ☐ Strongly Disagree
2. The supports I needed to participate were available (e.g. travel support, background information, etc.)
  - ☐ Strongly Agree
  - ☐ Agree
  - ☐ Neither agree nor disagree
  - ☐ Disagree
  - ☐ Strongly Disagree
3. I had enough information to contribute to the topics being discussed
  - ☐ Strongly Agree
  - ☐ Agree
  - ☐ Neither agree nor disagree
  - ☐ Disagree
  - ☐ Strongly Disagree
4. I was able to express my views freely
  - ☐ Strongly Agree
  - ☐ Agree
  - ☐ Neither agree nor disagree
  - ☐ Disagree
  - ☐ Strongly Disagree
5. I feel that my views were heard
  - ☐ Strongly Agree
  - ☐ Agree
  - ☐ Neither agree nor disagree
  - ☐ Disagree
  - ☐ Strongly Disagree
6. The **Physical Activity Summit** achieved its stated objectives
  - ☐ Strongly Agree
  - ☐ Agree
  - ☐ Neither agree nor disagree
  - ☐ Disagree
  - ☐ Strongly Disagree
7. I think the **Physical Activity Summit** will make a difference
  - ☐ Strongly Agree
  - ☐ Agree
  - ☐ Neither agree nor disagree
  - ☐ Disagree
  - ☐ Strongly Disagree
8. As a result of my participation in this **Physical Activity Summit**, I am better informed about implementation of physical activity in Northern BC
  - ☐ Strongly Agree
  - ☐ Agree
  - ☐ Neither agree nor disagree
  - ☐ Disagree
  - ☐ Strongly Disagree
9. This **Physical Activity Summit** was a good use of my time
  - ☐ Strongly Agree
  - ☐ Agree
  - ☐ Neither agree nor disagree
  - ☐ Disagree
  - ☐ Strongly Disagree

10. How would you like the results of your participation in the **Physical Activity Summit** to be used?

11. What was the best thing about the **Physical Activity Summit**?

12. Please identify one improvement we could make for future events.

13. If we were to hold another **Physical Activity Summit** would you attend, and if so when would be the best time to schedule it?

14. Additional comments:

Thank you for your feedback!

Adapted from:

Abelson J. Public and Patient Engagement Evaluation Tool (version 1.0). 2015. Available from:  
<https://healthsci.mcmaster.ca/ppe/our-products/public-patient-engagement-evaluation-tool>

Abelson J, Li K, Wilson G, Shields K, Schneider C, Boesveld S. Supporting quality public and patient engagement in health system organizations: development and usability testing of the Public and Patient Engagement Evaluation Tool. *Heal Expect*. 2015;19(4):817–27.

*The Public and Patient Engagement Evaluation Tool has been licensed under a Creative Commons Attribution-NonCommercial-Share Alike 4.0 International License. © 2015, Julia Abelson and the PPEET Research-Practice Collaborative. McMaster University. All rights reserved*
